# Supplementary material for: Interim results of the safety and immune-efficacy of 1 versus 2 doses of COVID-19 vaccine BNT162b2 for cancer patients in the context of the UK vaccine priority guidelines
Source: bioRxiv or medRxiv preprint supplement (doi:10.1101/2021.03.17.21253131), 2021-03-17

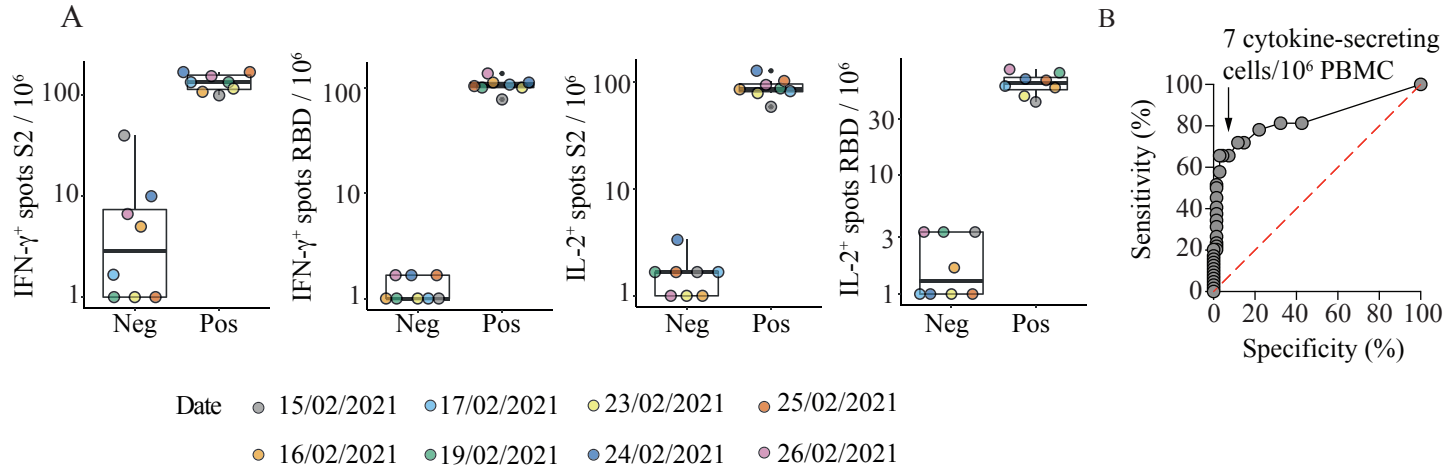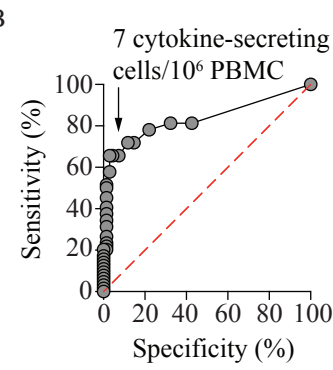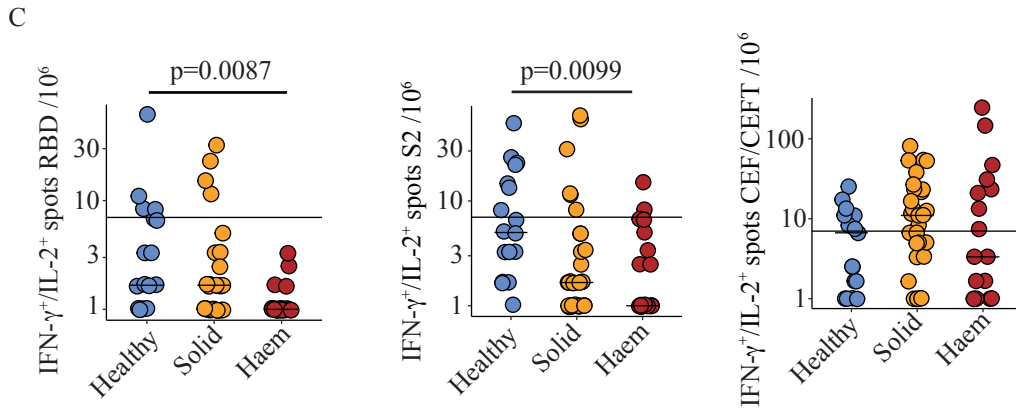

Supplement: Supplementary file [file media-2.pdf]
